# Supplementary material for: Pif1- and Exo1-dependent nucleases coordinate checkpoint activation following telomere uncapping
Source: PubMed Central journal article supplement — EMBO J. 2010 Nov 2;29(23):4020–34. doi: 10.1038/emboj.2010.267 (PMC3020640; doi:10.1038/emboj.2010.267), 2010-11-02
Supplement: emboj2010267s1.pdf [file emboj2010267s1.pdf]

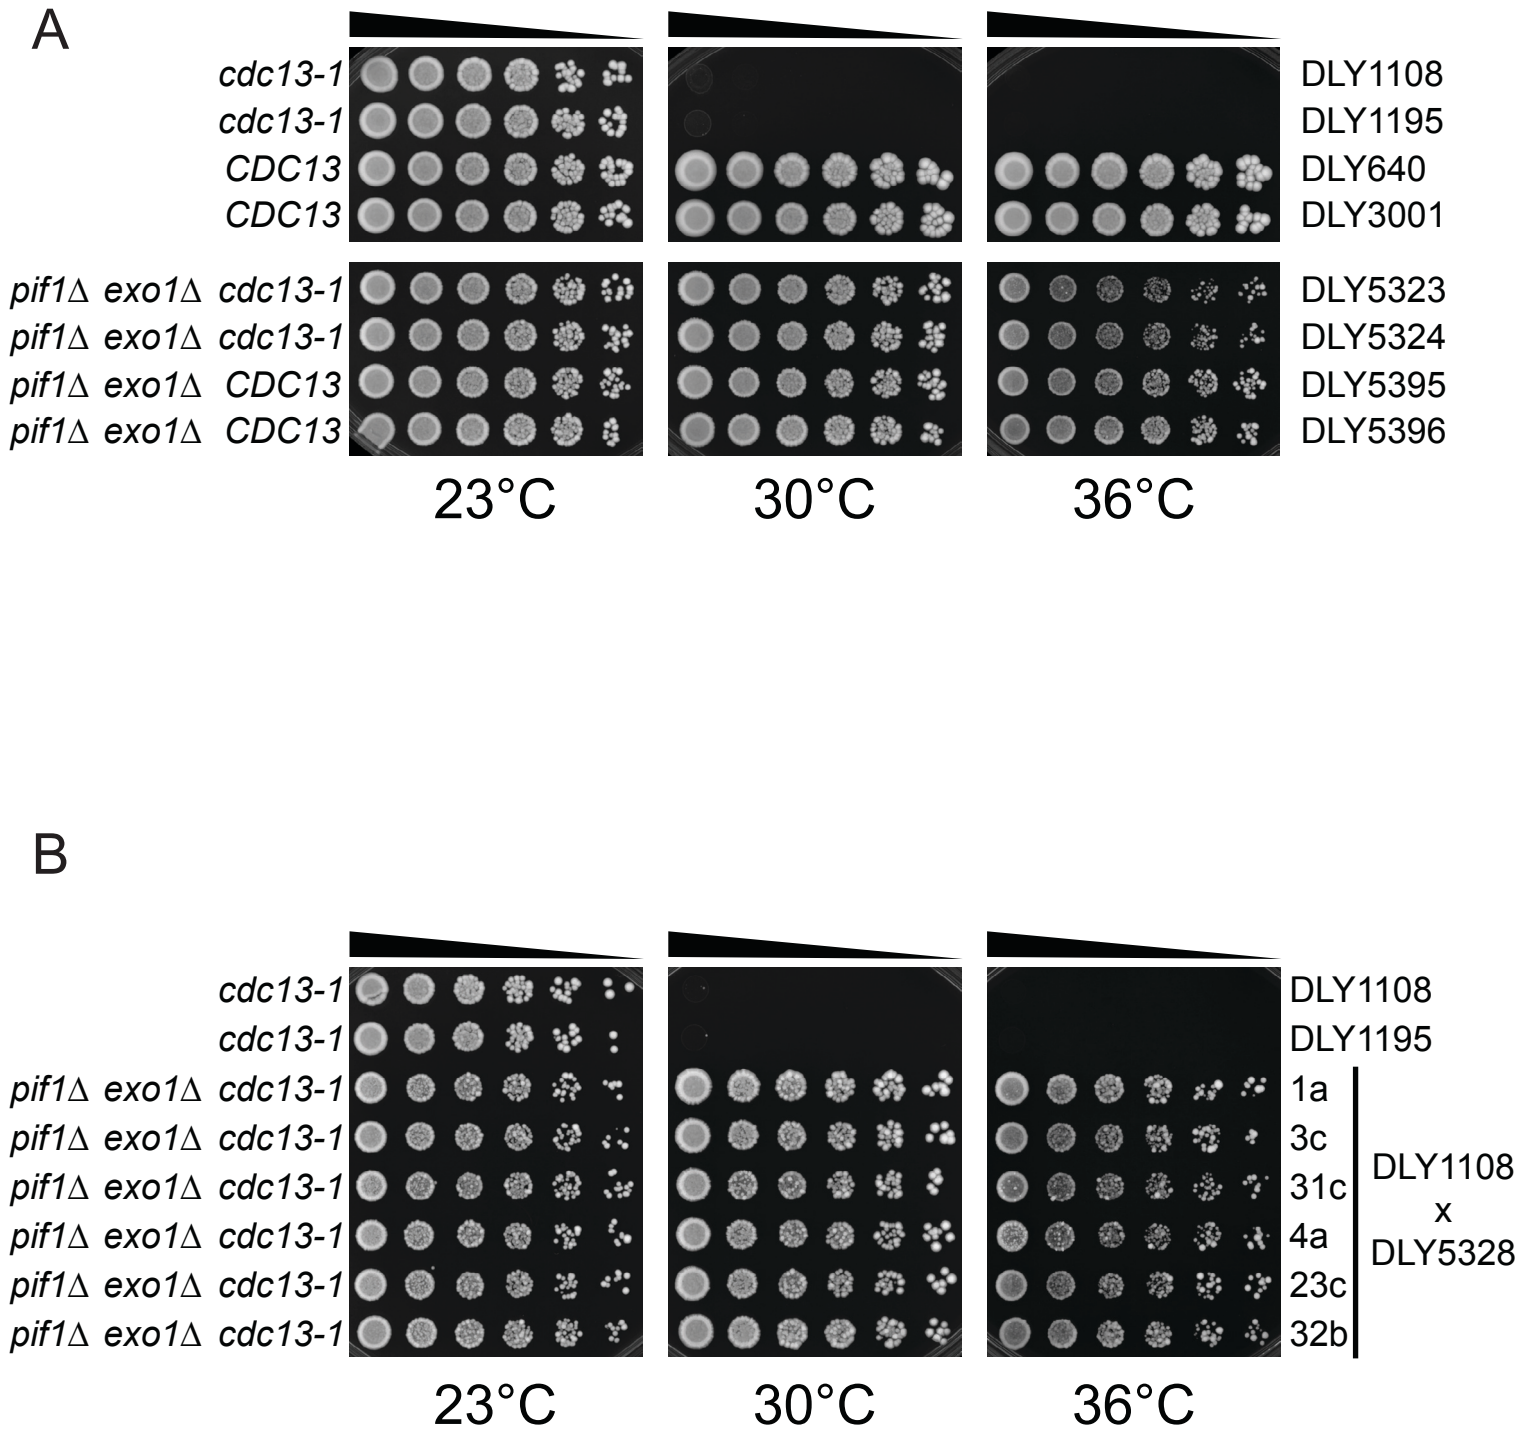

**A**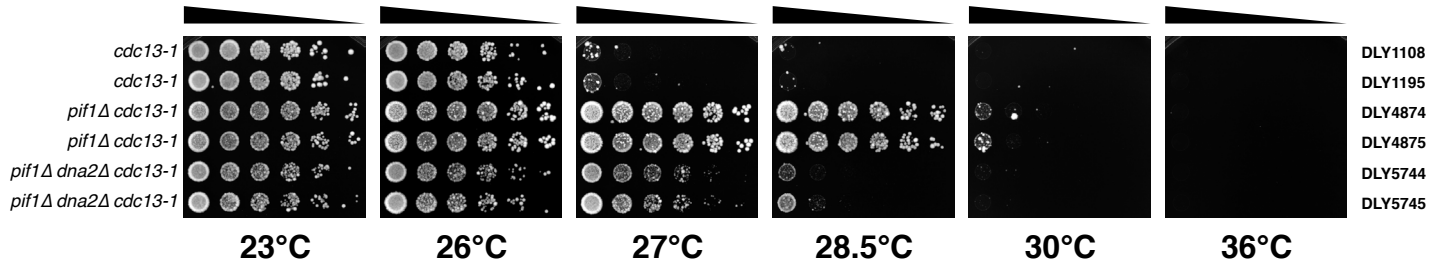**B**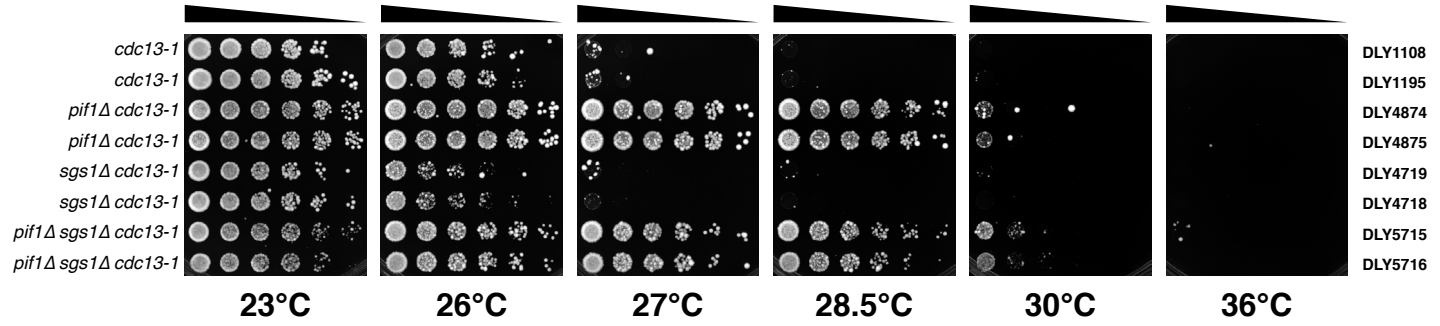

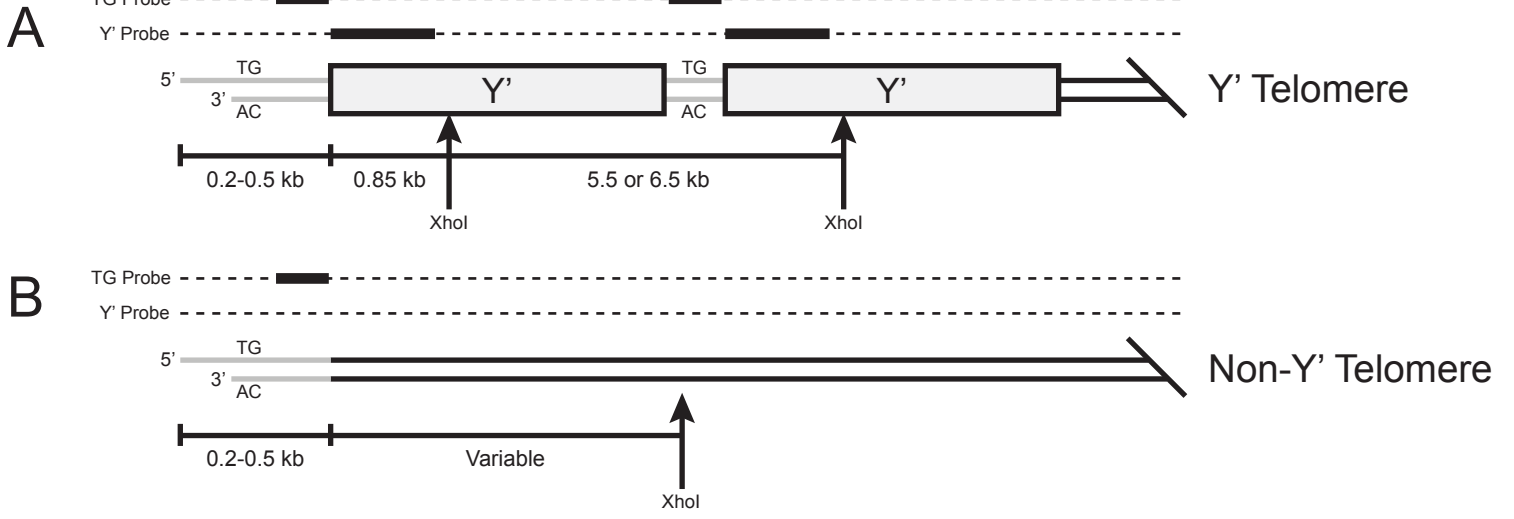

A

TG Probe

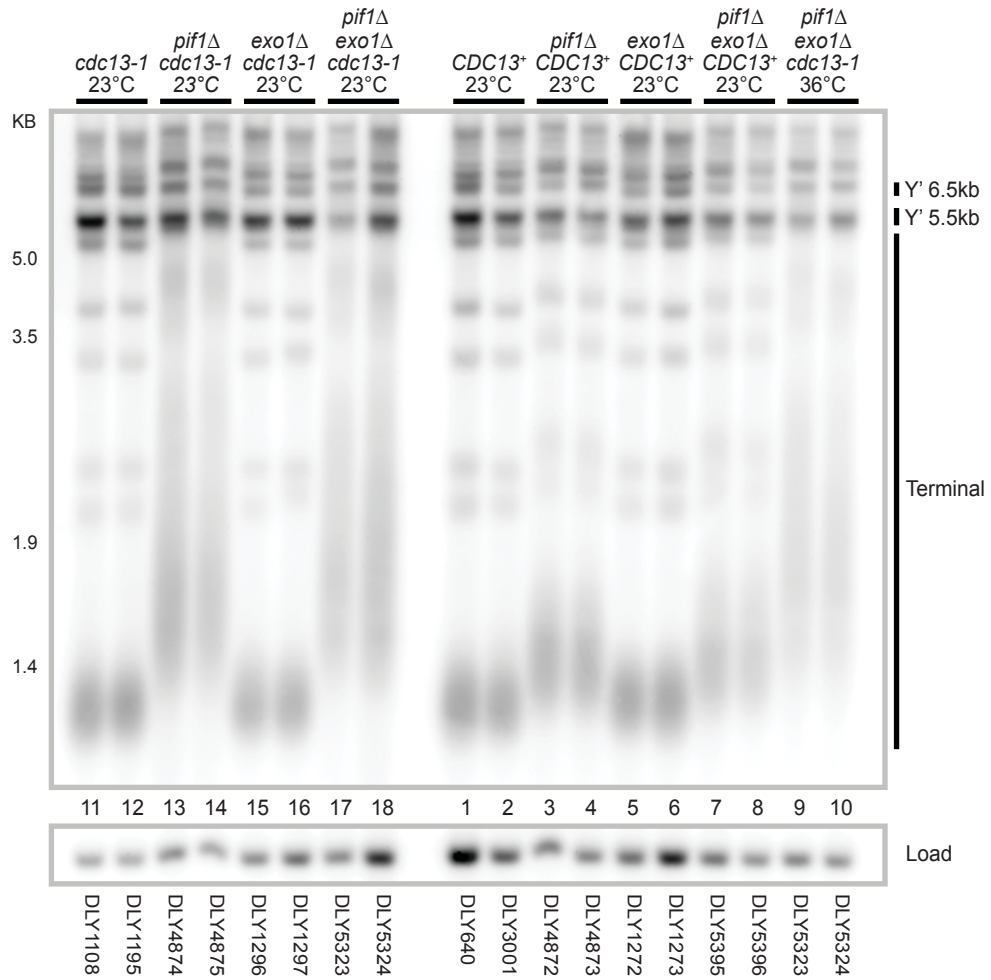

B

Y' Probe

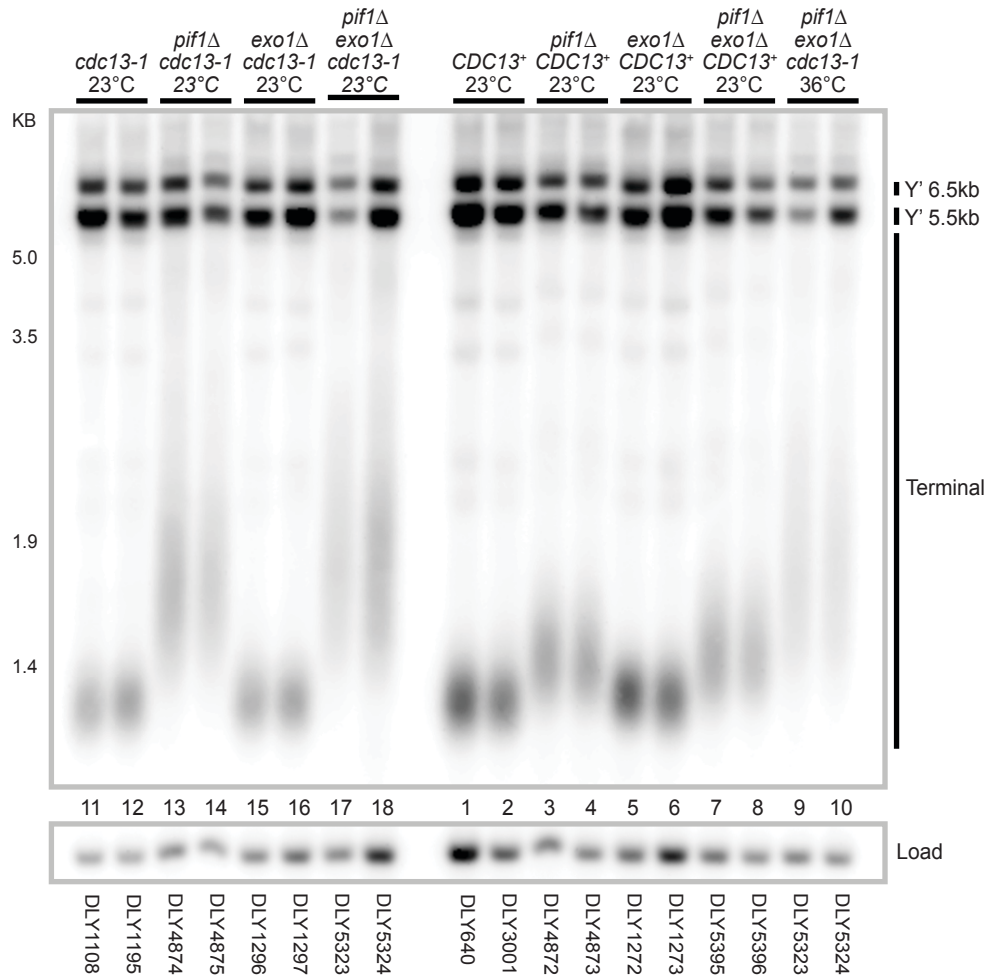

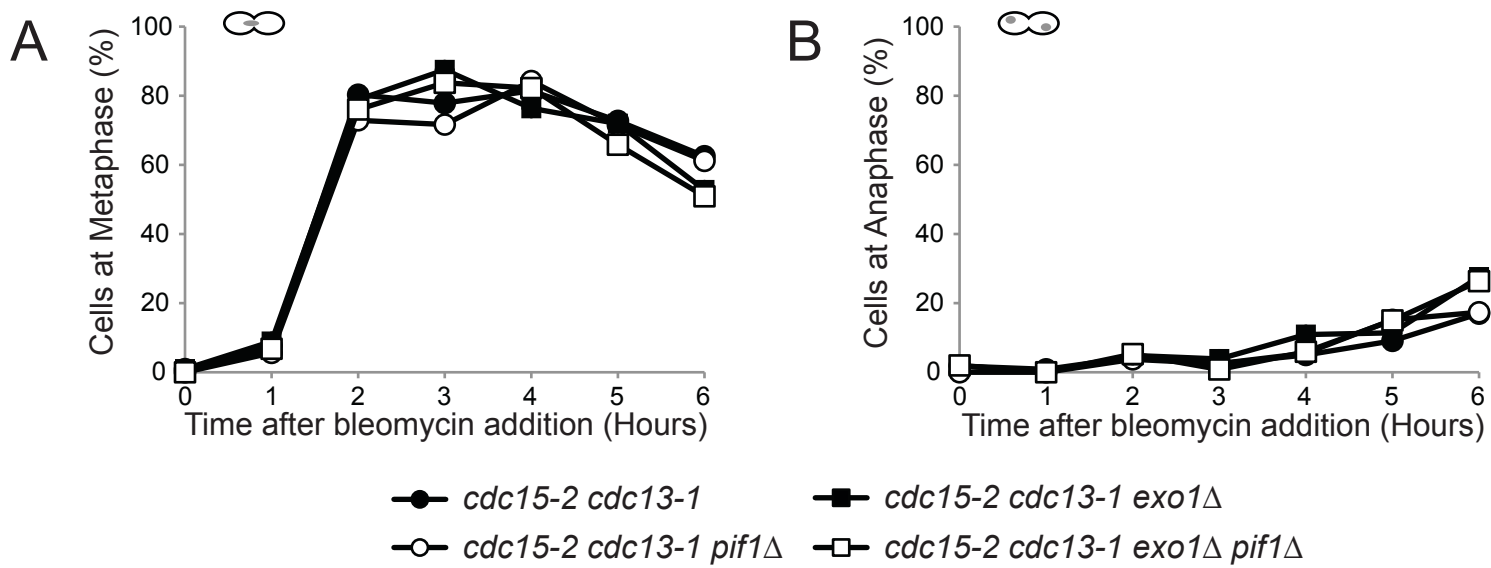

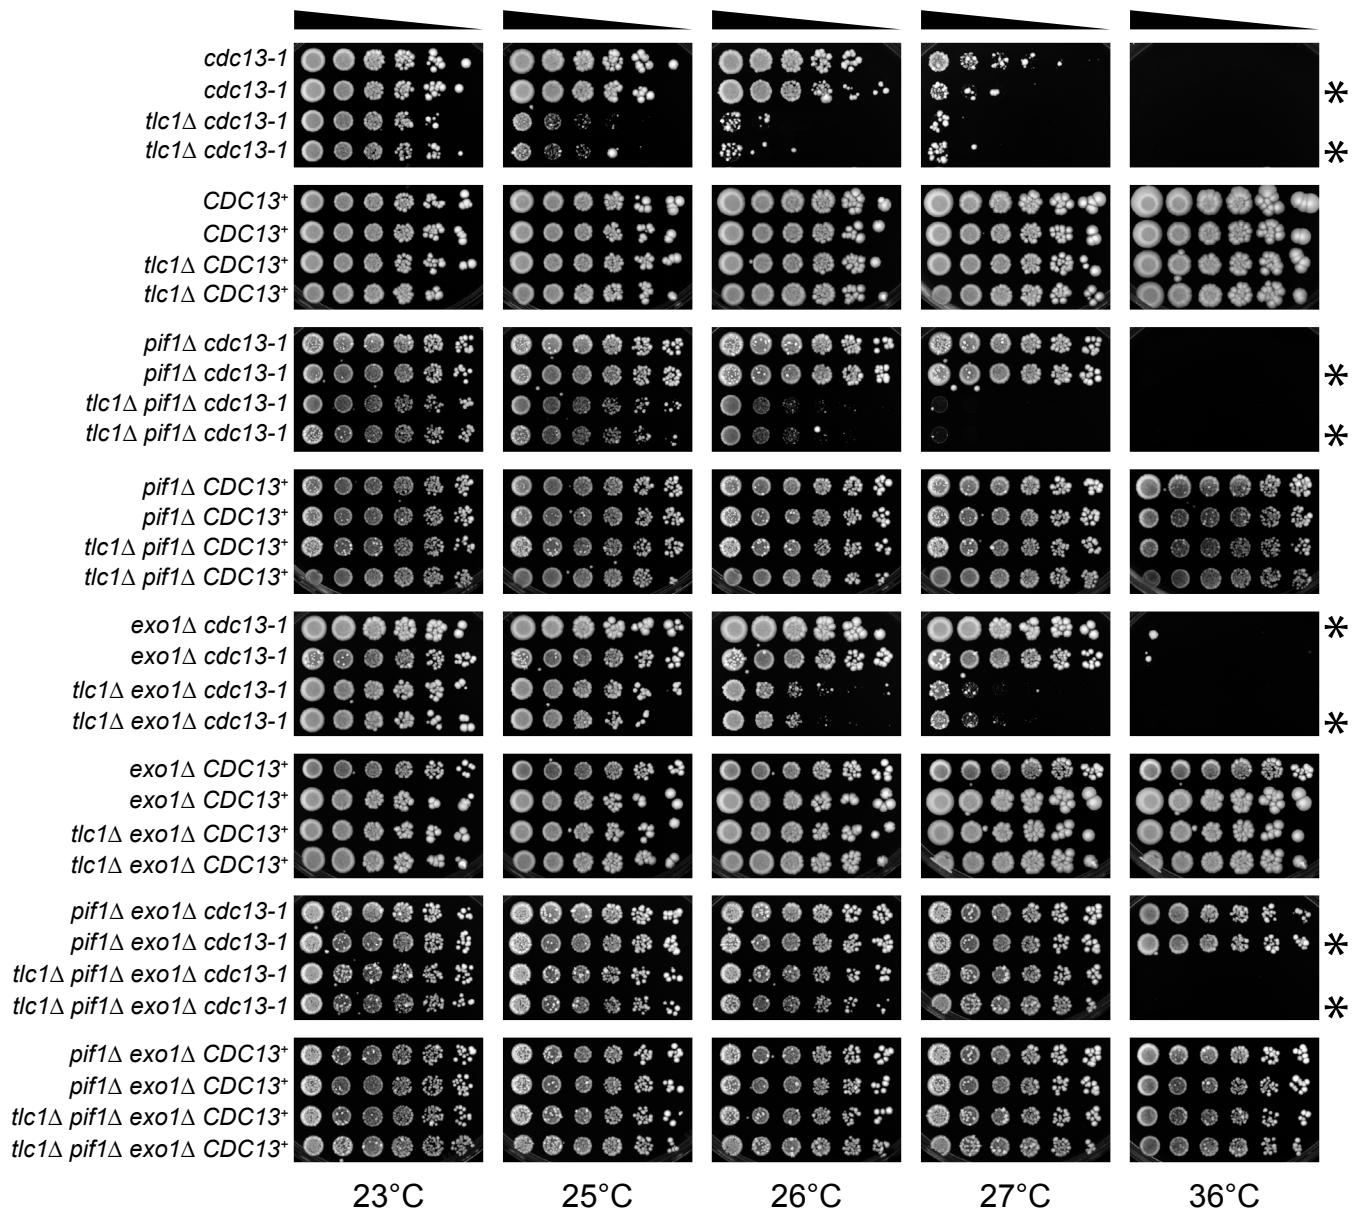

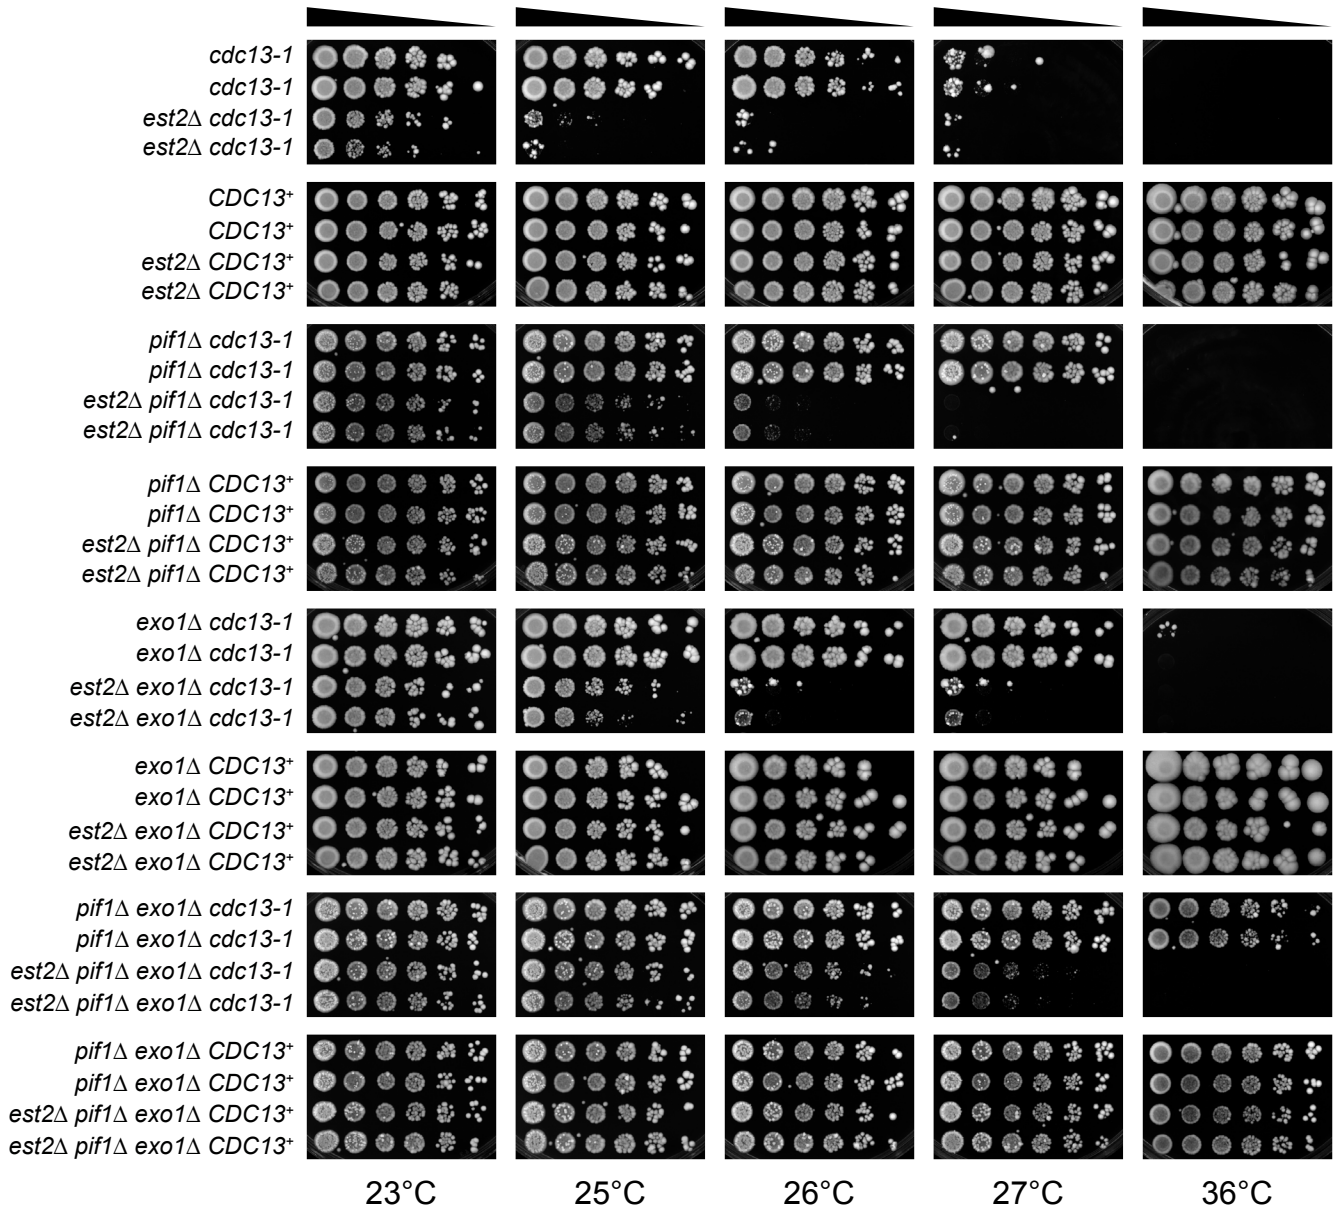

**A**

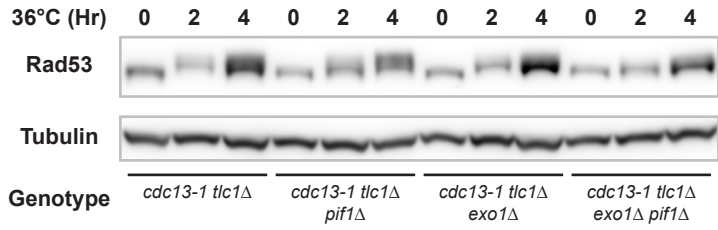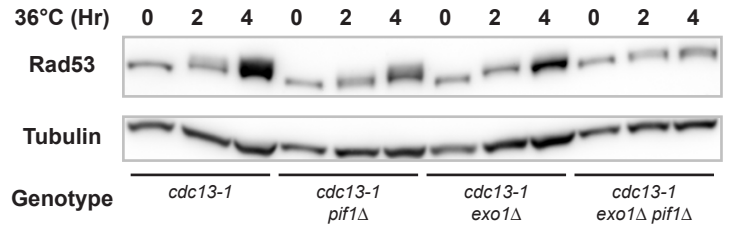

**B**

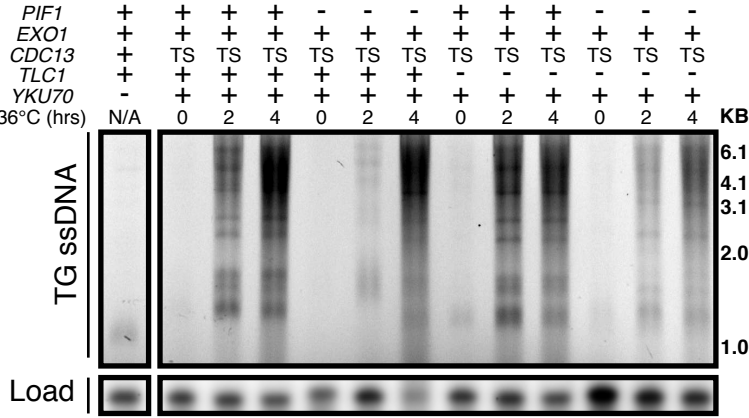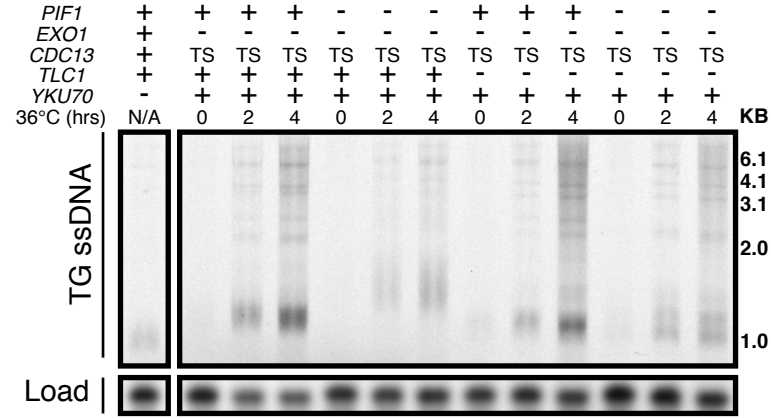

**C**

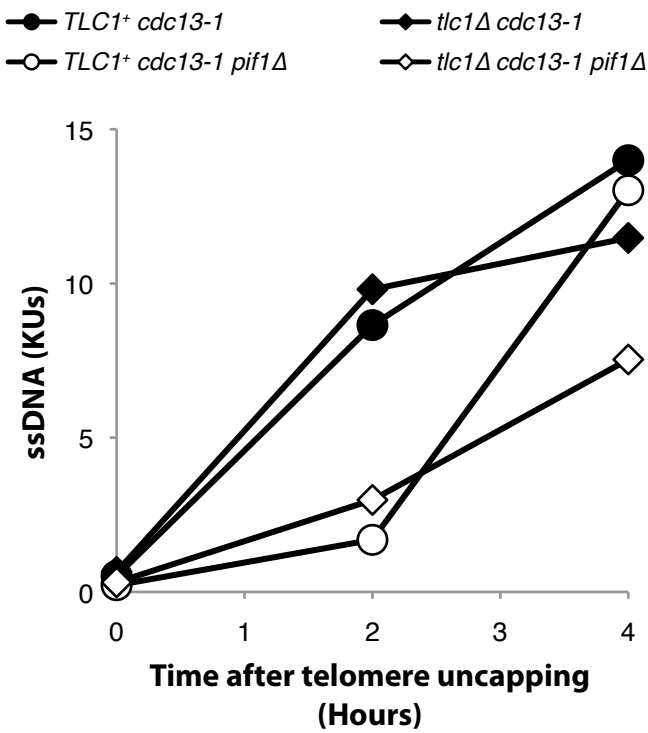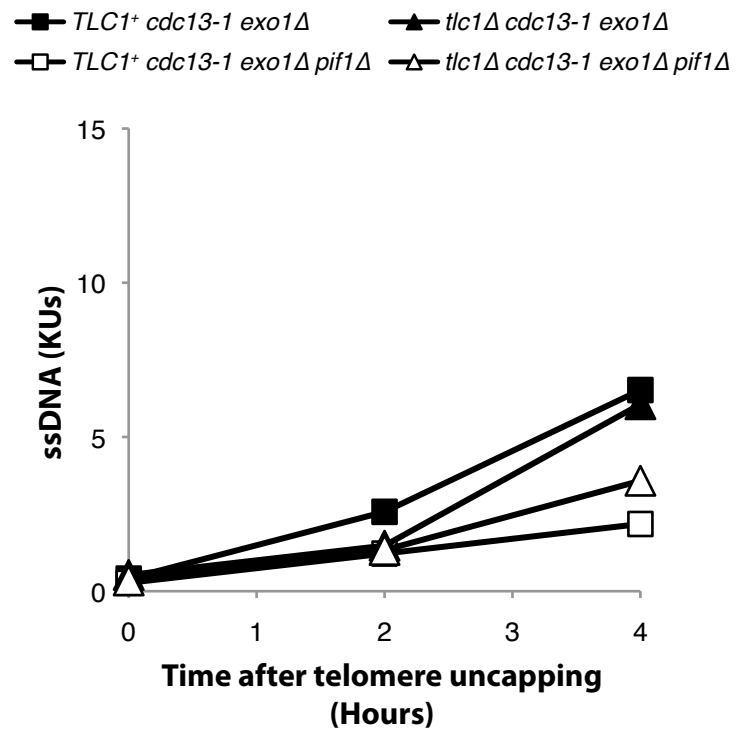

**D**

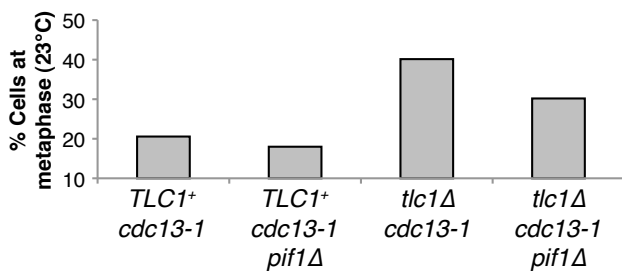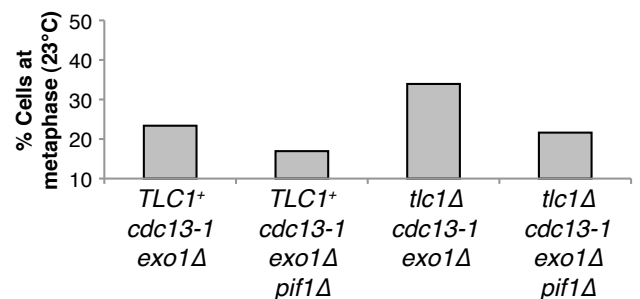



A

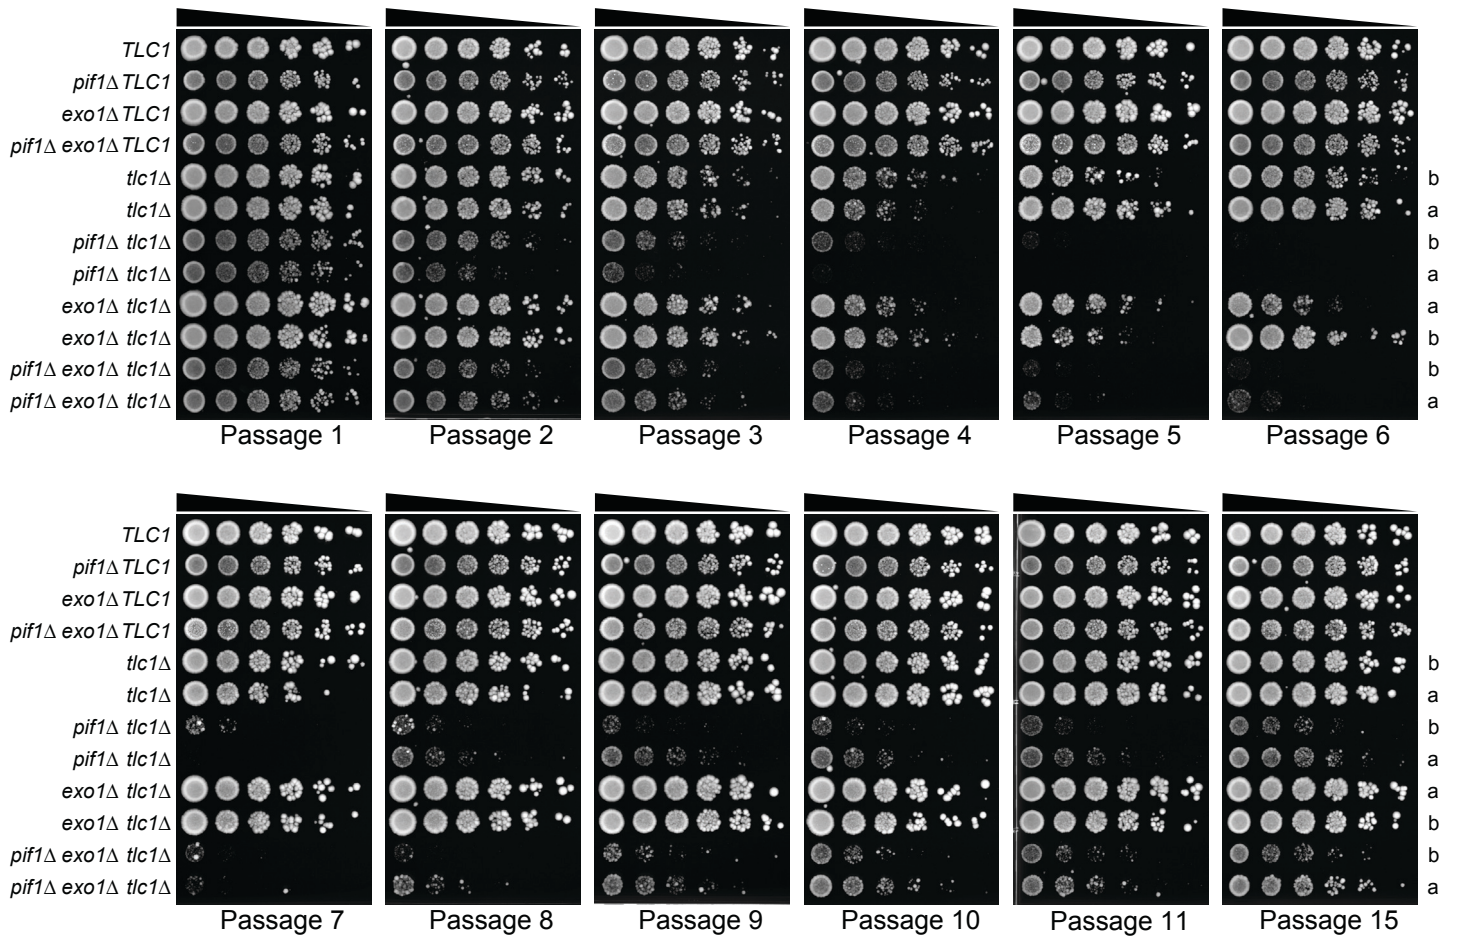

B

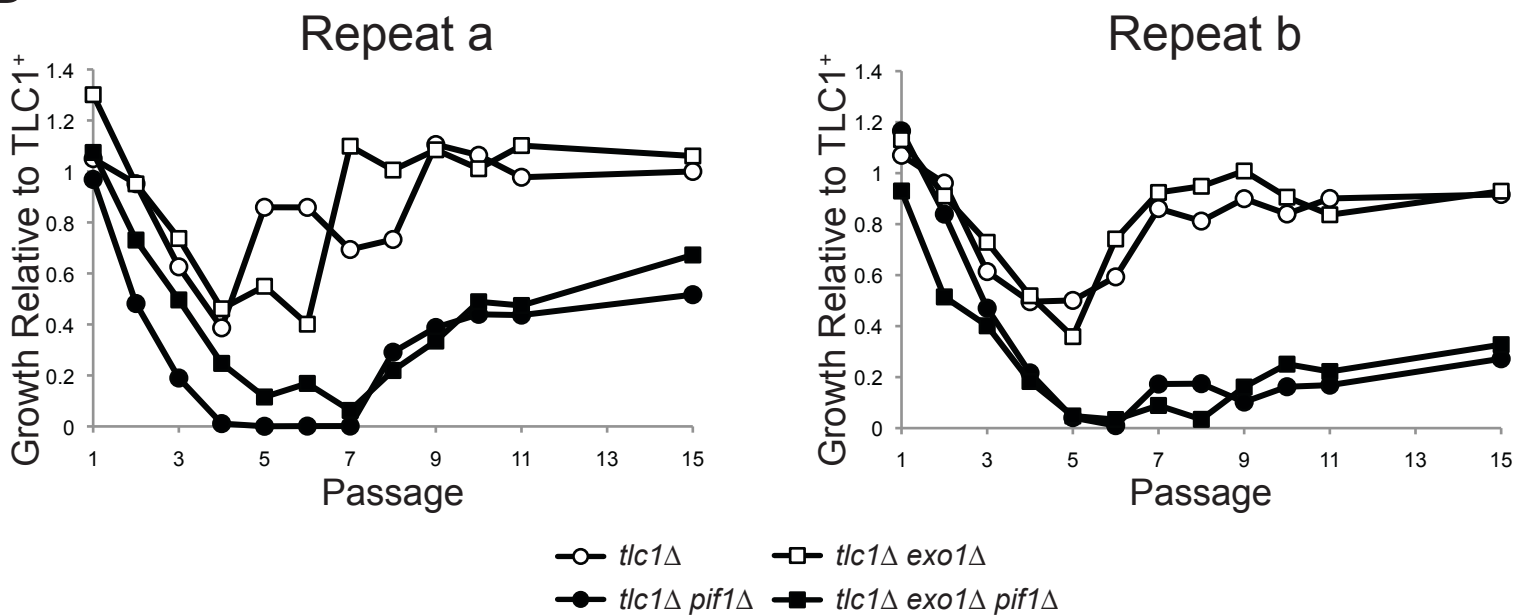

# TG Probe

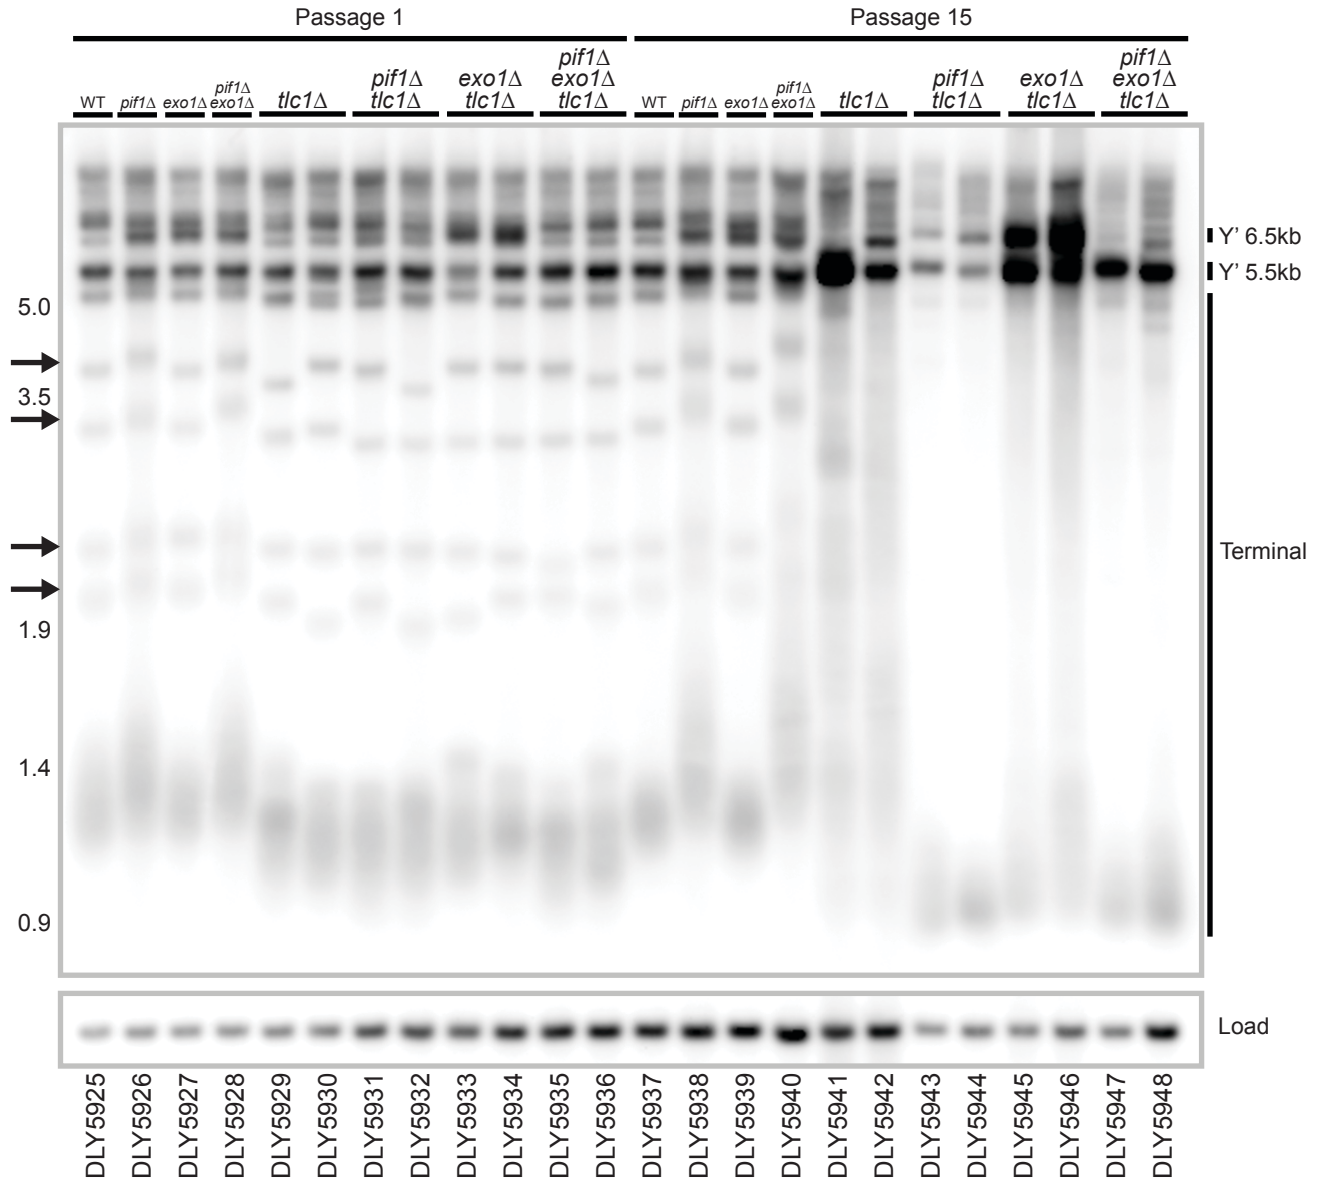

# Supplementary Figure 11

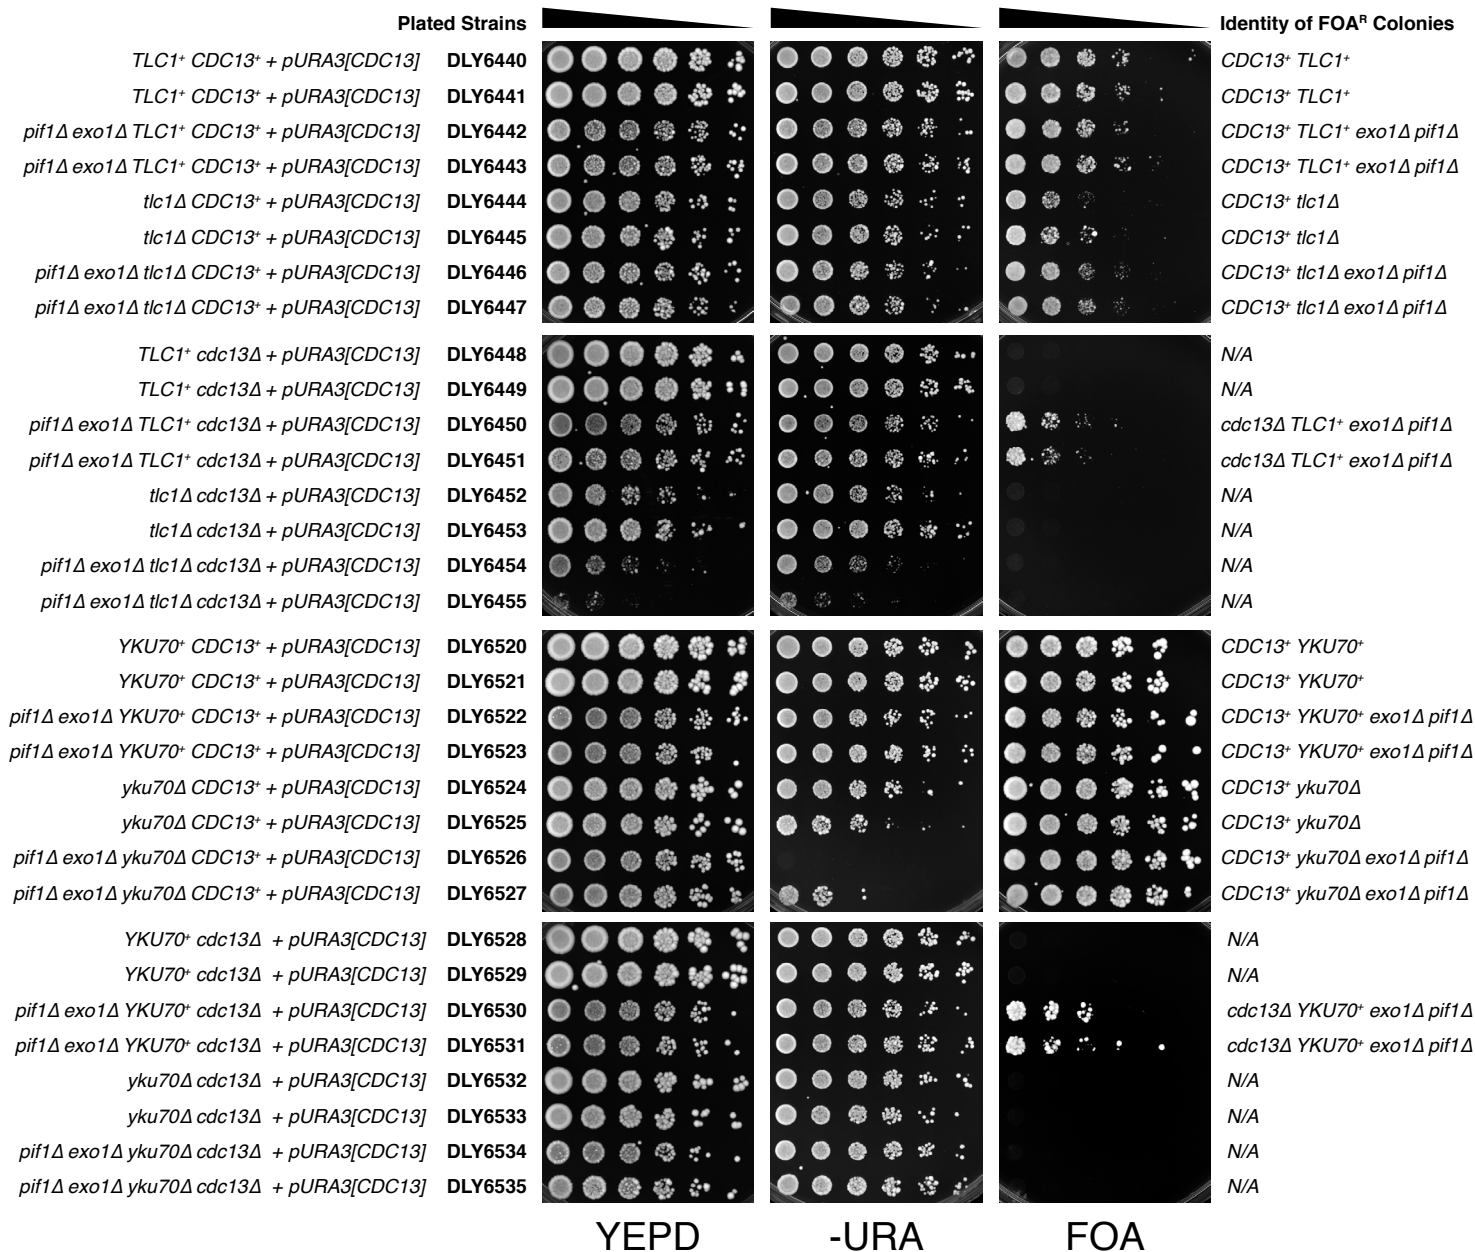

YEPD

-URA

FOA

# Supplementary Figure 12

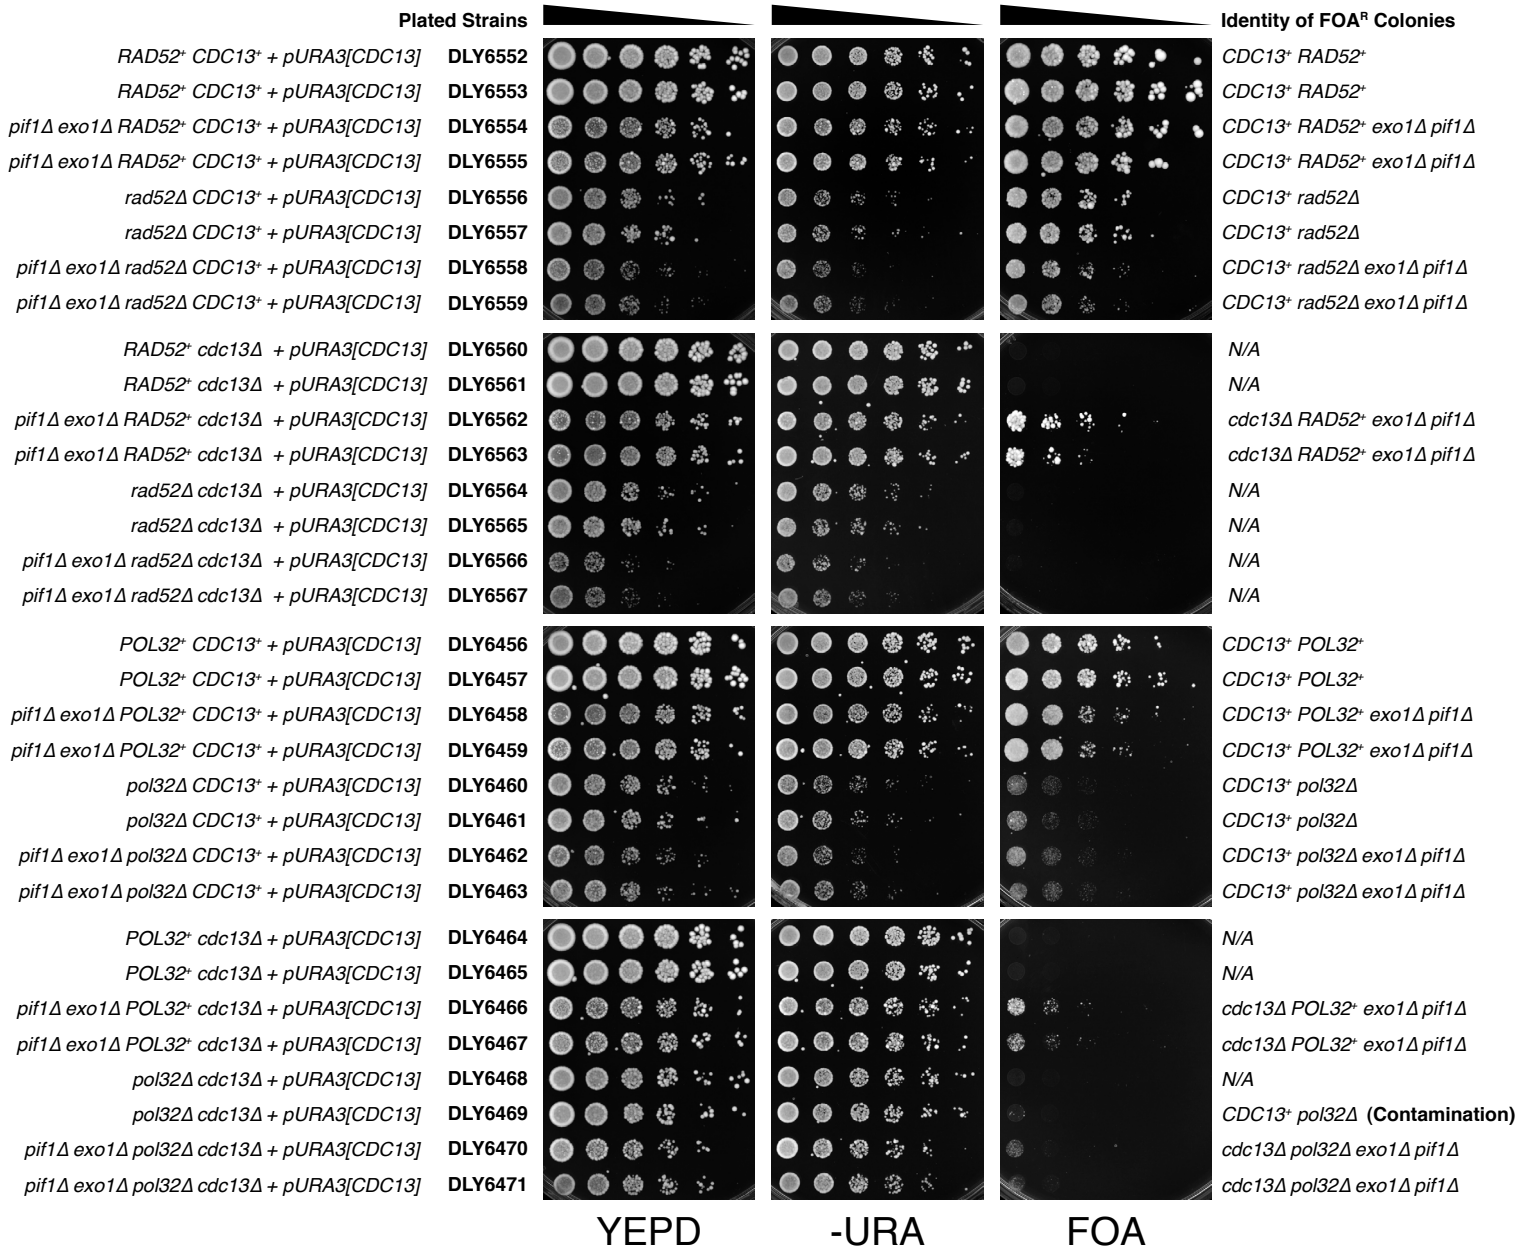

YEPD

-URA

FOA

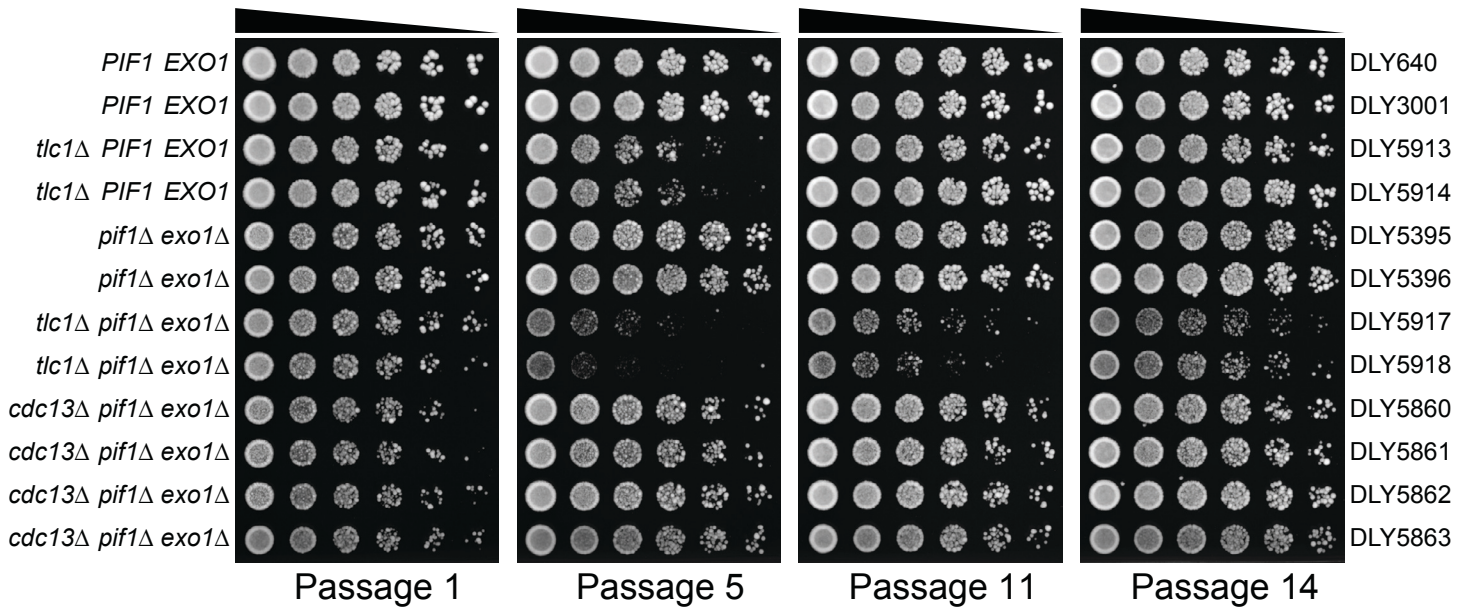

A

TG Probe

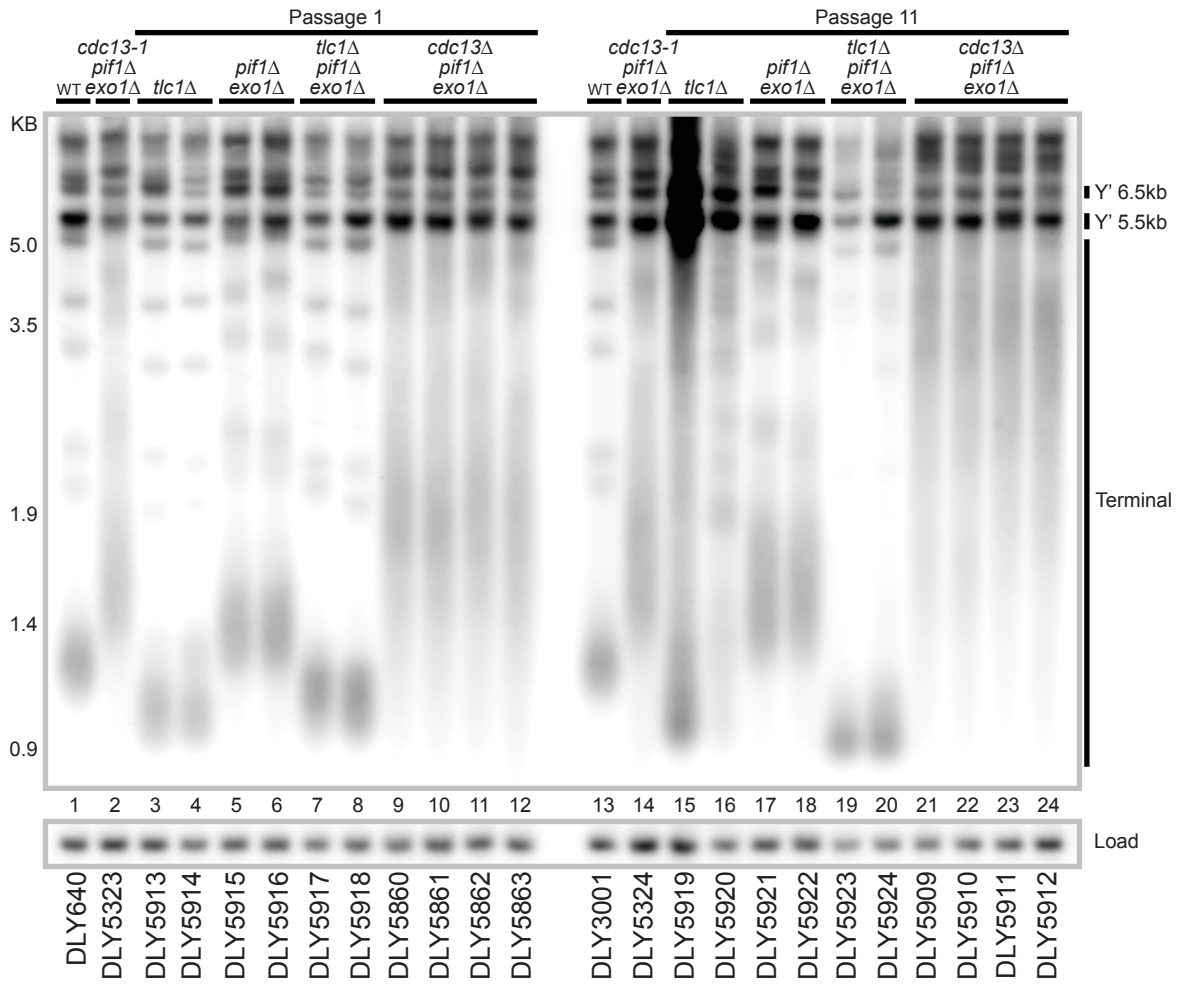

B

Y' Probe

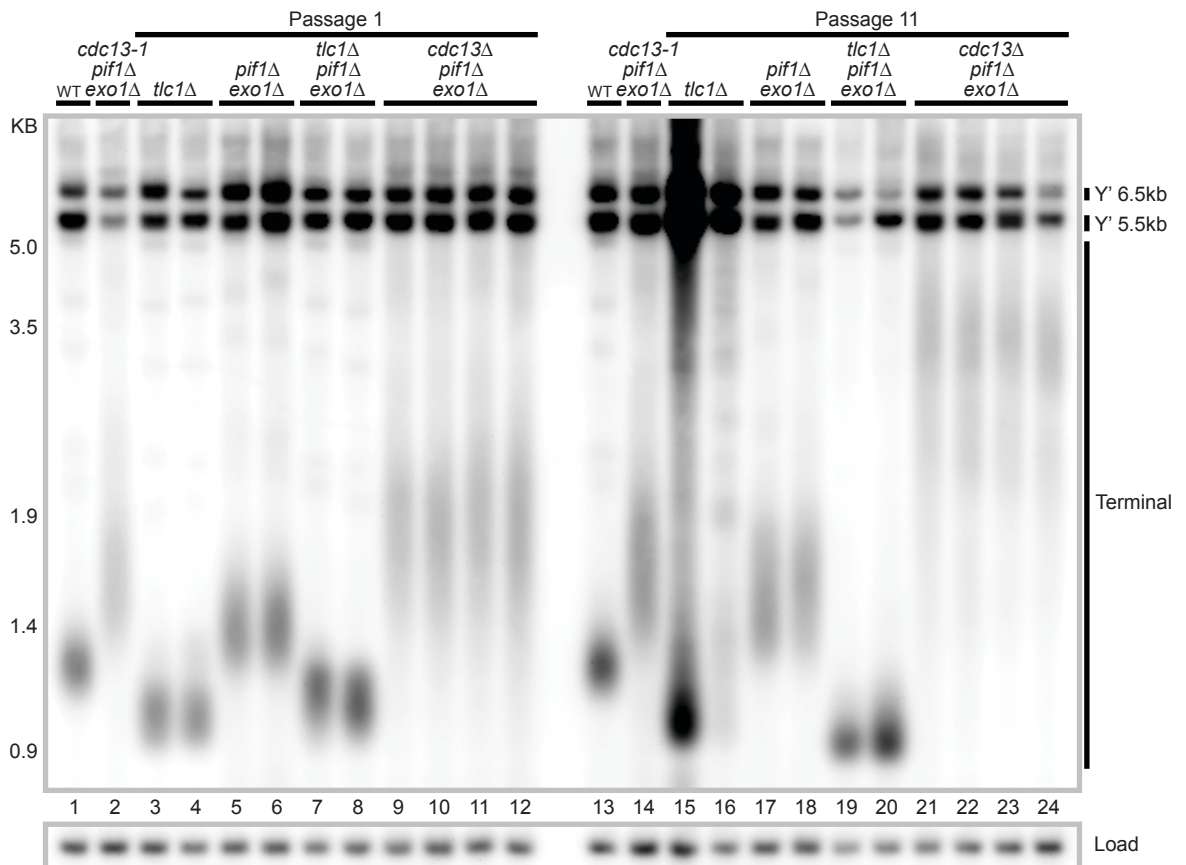

A

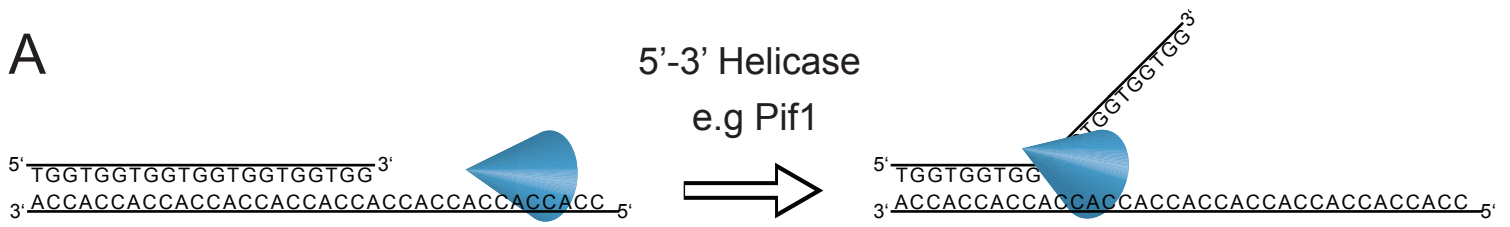

B

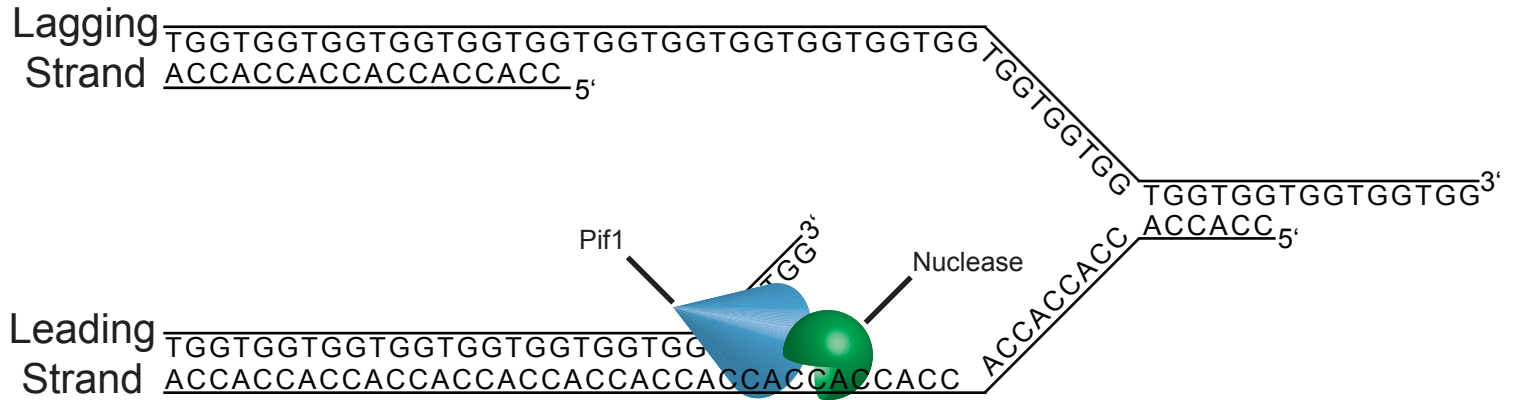

| <b>Diploid</b> | <b>Spores<br/>Dissected</b> | <i>PIF1</i> <sup>+</sup><br><i>EXO1</i> <sup>+</sup> <i>CDC13</i> <sup>+</sup><br>colonies<br>(expected) | <i>PIF1</i> <sup>+</sup><br><i>EXO1</i> <sup>+</sup> <i>CDC13</i> <sup>+</sup><br>colonies<br>(observed) | <i>pif1</i> Δ<br><i>exo1</i> Δ <i>CDC13</i> <sup>+</sup><br>colonies<br>(observed) | <i>pif1</i> Δ<br><i>exo1</i> Δ <i>cdc13</i> Δ<br>colonies<br>(observed) | <i>cdc13</i> Δ/ <i>CDC13</i> <sup>+</sup><br>viability (%) |
|----------------|-----------------------------|----------------------------------------------------------------------------------------------------------|----------------------------------------------------------------------------------------------------------|------------------------------------------------------------------------------------|-------------------------------------------------------------------------|------------------------------------------------------------|
| DDY340         | 176                         | 22                                                                                                       | 17                                                                                                       | 13                                                                                 | 12                                                                      | 92                                                         |
| DDY341         | 176                         | 22                                                                                                       | 23                                                                                                       | 19                                                                                 | 16                                                                      | 84                                                         |

**Supplementary Table I**
